# Supplementary material for: Autophagy Mediates the Degradation of Plant ESCRT Component FREE1 in Response to Iron Deficiency
Source: MDPI journal article supplement (doi:10.3390/ijms22168779), 2021-08-16
Supplement: s1 [file s1]

**Table S1. Primers used in this article**

Primers used for qRT-PCR

|              |                            |
|--------------|----------------------------|
| ATG4a-qPCR-F | GGCTGCATTGCAACTAGATTT      |
| ATG4a-qPCR-R | TCAGAGCATTTGCCAGTCATCTTCAC |
| ATG4b-qPCR-F | CTTTCACGTTCCCTCAAAGC       |
| ATG4b-qPCR-R | TTGCAATGGTAAGACGATGTG      |
| ATG6-qPCR-F  | GGAGATTCCAGATAAAAGTCGG     |
| ATG6-qPCR-R  | ACGATGGTAAGGGAGTGGTG       |
| ATG8a-qPCR-F | CAATTTGTATACGTGGTTCGT      |
| ATG8a-qPCR-R | AGCAACGGTAAGAGATCCAA       |
| ATG8b-qPCR-F | TTGGCCAATTTGTGTACGTT       |
| ATG8b-qPCR-R | TCCACCAAATGTGTTCTCTCC      |
| UBQ10-qPCR-F | CGGAAAGCAGTTGGAGGATGG      |
| UBQ10-qPCR-R | CGGAGCCTGAGAACAAGATGAAG    |
| FREE1-qPCR-F | TATTACTCACCGTATGATCAGCATC  |
| FREE1-qPCR-R | ATGAATAAGGCGCGGGATTAG      |
